# Supplementary material for: Community Engagement in the Development of an mHealth-Enabled Physical Activity and Cardiovascular Health Intervention (Step It Up): Pilot Focus Group Study
Source: JMIR Form Res. 2019 Jan 4;3(1):e10944. doi: 10.2196/10944 (PMC6682281; doi:10.2196/10944)
Supplement: Multimedia Appendix 4 [file formative_v3i1e10944_app4.pdf]

|                                                                                                                                                                                |
|--------------------------------------------------------------------------------------------------------------------------------------------------------------------------------|
| <b>Supplemental Digital Content 3. Moderator's Guide</b>                                                                                                                       |
| <i>Icebreaker – Participants were given screen shots of the application and a list of all the motivational messages.</i>                                                       |
| Mark your favorite aspect of the app, redesign an element of the app, or add anything that's missing.                                                                          |
| Place a star next to your top 3 messages on each page.                                                                                                                         |
| <i>Application and Fitbit Follow-up</i>                                                                                                                                        |
| 1. What were the hardest instructions to follow and why? What were the easiest instructions to follow and why?                                                                 |
| 2. In what ways did the app encourage you to increase your physical activity? In what ways did it discourage you, or feel unhelpful?                                           |
| 3. What did you think of the timing of the messages and when they were delivered?<br>Probe: Too many, too few, inconvenient times, etc.                                        |
| 4. In general, what did you think of the content of the messages?                                                                                                              |
| 5. How did you feel about the photos that accompanied the messages?                                                                                                            |
| 6. What were the overarching themes you identified within the messages? Which were helpful, not helpful? How did they help, not help?<br>Probe: Encouraging, goals, tips, etc. |
| 7. Was there a specific message that stood out to you?<br>Probe: Describe how that message was good/bad, or how it made you feel.                                              |
| 8. What did you think about the message-board, or wall?<br>Probe: Did you find it helpful? Repetitive?                                                                         |
| 9. What did you think about the educational modules?<br>Probe: Content? Length? Format? Suggestions for improvement?                                                           |
| 10. What did you think about the prize recipe?<br>Probe: How did it make you feel? Did you make the item?                                                                      |
| 11. What did you think about the daily assessment?<br>Probe: Too many questions? Inconvenient? Suggestions for improvement?                                                    |
| 12. Please tell us about which features you liked on the Fitbit app.<br>Probe: Ease of use? Prizes? Competition with other users?                                              |
| 13. What problems or issues did you have using the device or app in the last few weeks?                                                                                        |
| 14. What difficulties or issues did you have with accessing the app content from your devices?                                                                                 |
| 15. What difficulties did you have with the activity tracker/wristband (Fitbit)?<br>Probe: Issues with syncing? Charging?                                                      |
| 16. Did you have any skin irritation, rash, pain, or physical issues while using the Fitbit? How bad were those issues?                                                        |
| <i>Wrap Up</i>                                                                                                                                                                 |
| 17. What are your overall thoughts and feedback regarding the app?<br>Probe: Recommendations/suggestions for feasibility?                                                      |
| 18. Who do you think would be most likely to use this app in your community?<br>Probe: People who want to lose weight, increase their activity, or improve overall health      |
| 19. How do you think a member of your community would respond to receiving this app and activity tracker?<br>Probe: Concerns about data plan, tracking, etc.                   |
| 20. What do you see as potential barriers for people using this app in your community?<br>Probe: Data plan, comfort level with technology, time, childcare, etc.               |
| 21. Would it be valuable, or unnecessary to offer these activity trackers and apps in your community? Explain.                                                                 |
| 22. Do you have any suggestions for other things you would like to see or use if this app was offered to you and others in your community?                                     |
| 22. Is there anything we have not discussed that you would like to share?                                                                                                      |
